# Supplementary material
Source: publisher figshare collection journal article supplement (https://tandf.figshare.com/ndownloader/files/12486875)
Supplement: Supplementary file 1 [file 12486875]

# **Appendix A** **- Interview Guide**

The following speaking points and questions were used as a preliminary basis for conducting interviews in this study. The interviews were conducted in a semi-structured conversational manner, which resulted in some deviations from this interview script that are not captured here.

#### Introductory comments and questions

- The aim of this research project is to develop human well-being indicators and metrics for Haida Gwaii.
- The indicators and metrics will be more broadly useful, so that various organizations on Haida Gwaii can use them to track quality of life on Haida Gwaii.
- Please explain what you think is important to measure for human well-being on Haida Gwaii. We will use the comments we receive from everyone during the interviews to create a list of indicators and metrics that make sense for Haida Gwaii.
- Please note there is no right answer for what indicators and metrics we should measure. However, human well-being indicators and metrics are more useful if they are based on what is important to a certain place and culture.
- Did you have a chance to review the consent form? Do you have any questions about it? Would you please sign the consent form?

#### Interview questions

1. Could you tell me what you think is important to measure for human well-being on Haida Gwaii? *For each topic or metric suggested, we asked the following follow-up questions*:
   1. Why is this important? How would you measure this? Should it increase or decrease?

#### Concluding remarks

Thank you for sharing your knowledge with us today. We will be talking with other people on Haida Gwaii and asking them the same questions we talked about today.
